## Distributions of hypothalamic neuron populations co-expressing tyrosine hydroxylase and the vesicular GABA transporter in the mouse

Kenichiro Negishi<sup>1,5</sup>, Mikayla A. Payant<sup>2,5</sup>, Kayla S. Schumacker<sup>2,5</sup>, Gabor Wittmann<sup>3</sup>, Rebecca M. Butler<sup>2</sup>, Ronald M. Lechan<sup>3</sup>, Harry W. M. Steinbusch<sup>4</sup>, Arshad M. Khan<sup>1,6</sup>, Melissa J. Chee<sup>2,6</sup>

<sup>1</sup>UTEP Systems Neuroscience Laboratory, Department of Biological Sciences, and Border Biomedical Research Center, University of Texas at El Paso, El Paso, TX 79968, USA; <sup>2</sup>Department of Neuroscience, Carleton University, Ottawa, ON, K1S 5B6, Canada; <sup>3</sup>Department of Medicine, Division of Endocrinology, Diabetes and Metabolism, Tufts Medical Center, Boston, MA 02111, USA; <sup>4</sup>Department of Psychiatry and Neuropsychology, School for Mental Health and Neuroscience, Maastricht University, Maastricht, Netherlands.

### Author footnotes

<sup>5</sup>KN, MAP, KSS contributed equally to the manuscript.

<sup>6</sup>AMK and MJC are joint senior authors.

### Address correspondence to:

Melissa Chee  
5309 Health Science Building,  
1125 Colonel By Drive,  
Ottawa ON K1S 5B6  
Canada

### Key words

zona incerta, dopamine, hypothalamus, GABA, tyrosine hydroxylase, vGAT, catecholamine

### Acknowledgments

This work is supported by NSERC Discovery Grant RGPIN-2017-06272 (MJC), NIH grants GM109817 and GM127251 (AMK), UTEP Office of Research and Sponsored Projects (AMK), and NIH center grant (2U54MD007592) funds to AMK awarded to the Border Biomedical Research Center at UTEP.

## Abstract

The hypothalamus, which includes the zona incerta, contains a discrete population of catecholaminergic neurons marked by the expression of tyrosine hydroxylase (TH). As multiple chemical messengers may coexist in each neuron, we determined if hypothalamic TH-immunoreactive (ir) neurons may also express glutamate or GABA. We used Cre/loxP recombination to express enhanced GFP fluorescence in neurons that express the vesicular glutamate (vGLUT2) or GABA transporter (vGAT) and determined TH immunoreactivity in glutamatergic or GABAergic neurons, respectively. EGFP-labeled vGLUT2 neurons were not TH-ir. However, there were discrete TH-ir signals that colocalized with EGFP-positive vGAT neurons, which we validated by *in situ* hybridization for *Vgat* mRNA. In order to contextualize the observed pattern of TH+EGFP colocalization in vGAT neurons, we first performed Nissl-based parcellation and plane-of-section analysis, and then mapped the distribution of TH-ir vGAT neurons onto atlas templates from the *Allen Reference Atlas* of the mouse brain. TH-ir vGAT neurons were distributed throughout the rostrocaudal extent of the hypothalamus and were localized primarily to the periventricular hypothalamic zone, periventricular hypothalamic region, and lateral hypothalamic zone. There was a very strong presence of EGFP fluorescence in TH-ir neurons across all brain regions where it was observed, but the most striking colocalization was found in the zona incerta (ZI), where every TH-ir neuron was EGFP-positive. Neurochemical characterization of these ZI neurons revealed that they display immunoreactivity for dopamine but not dopamine  $\beta$ -hydroxylase. In aggregate, these findings indicate the existence of a novel hypothalamic population that may signal through the release of GABA and/or dopamine.

## 1. Introduction

The prevailing view of neurotransmission is that multiple chemical messengers can coexist, in various combinations, within single neurons and in some cases can even be co-stored in synaptic vesicles (Hökfelt *et al.*, 1986). These chemical messengers may be neurotransmitters like glutamate and GABA that rapidly initiate and terminate discrete synaptic events, or neuromodulators like neuropeptides and catecholamines that can have varied release probabilities, time courses of release, or long-range target sites. In fact, virtually all neuropeptidergic neurons also harbor a neurotransmitter, as exemplified by brain structures in the hypothalamus. For example, neurons in the arcuate hypothalamic nucleus coexpress the neuropeptides Agouti-related protein and neuropeptide Y (Broberger, de Lecea, Sutcliffe, & Hökfelt, 1998; Broberger, Johansen, Johansson, Schalling, & Hökfelt, 1998; Hahn, Breininger, Baskin, & Schwartz, 1998) as well as the neurotransmitter GABA (Tong, Ye, Jones, Elmquist, & Lowell, 2008).

Colocalized neurotransmitters and neuromodulators may work in tandem or opposition to prolong or suppress neuronal functions (van den Pol, 2012). For instance, neurons in the lateral hypothalamic area that express either melanin-concentrating hormone (MCH) or hypocretin/orexin (H/O) have transcripts encoding the machinery for vesicular storage of glutamate (Mickelsen *et al.*, 2017). Both of these neuronal populations can release glutamate and produce transient excitatory glutamatergic events (Chee, Arrigoni, & Maratos-Flier, 2015; Schöne, Apergis-Schoute, Sakurai, Adamantidis, & Burdakov, 2014), but MCH inhibits (Sears *et al.*, 2010; Wu, Dumalska, Morozova, van den Pol, & Alreja, 2009) whereas H/O stimulates neuronal activity (Schöne *et al.*, 2014). Additionally, these coexpressed messengers may also serve distinct functions. For example, MCH, but not glutamate from MCH neurons, promotes rapid eye movement sleep (Naganuma, Bandaru, Absi, Chee, & Vetrivelan, 2019), while glutamate has been shown to encode the nutritive value of sugars (Schneeberger *et al.*, 2018).

The colocalization between neuropeptides and catecholamines is also well-studied. The catecholamines are a major class of monoamine messengers that include dopamine, norepinephrine, and epinephrine. Their presence in neurons is indirectly indicated by the detection of immunoreactivity for tyrosine hydroxylase (TH; EC 1.14.16.2), which mediates the rate-limiting step in catecholamine biosynthesis (Udenfriend & Wyngaarden, 1956; Nagatsu, Levitt & Udenfriend, 1964). Discrete populations of TH-immunoreactive (ir) neurons have been reported in the hypothalamus (Björklund & Lindvall, 1984; Hökfelt, Johansson, Fuxe, Goldstein, & Park, 1976), and they may also colocalize with additional neurotransmitters and/or neuropeptides. Hypothalamic TH-ir neurons are primarily found within the zona incerta (ZI) (Björklund & Nobin, 1973) and periventricular parts of the hypothalamus (Hökfelt, Johansson, Fuxe, Goldstein, & Park, 1976; Ruggiero, Baker, Joh, & Reis, 1984), which is composed of neurochemically and functionally diverse gray matter regions. For example, hypothalamic dopamine neurons may colocalize with galanin and neurotensin as well as with markers for GABA synthesis (Everitt *et al.*, 1986). Furthermore, recent work has demonstrated that dopaminergic neurons in the arcuate nucleus corelease GABA (Zhang & van den Pol, 2015), and that both neurotransmitters regulate feeding in response to circulating metabolic signals (Zhang & van den Pol, 2016).

Single-cell RNA sequencing has revealed that neurochemically defined populations, such as hypothalamic TH-expressing neurons, can be further sorted into transcriptionally distinct subgroups (Romanov *et al.*, 2017). Gene expression-based cluster analysis is a powerful tool for identifying

subpopulations within seemingly homogeneous cell groups (Romanov *et al.*, 2017). However, it is necessary for these transcriptomic studies to be supported and framed by accurate structural information (Crosetto, Bienko, & van Oudenaarden, 2015; Khan *et al.*, 2018). Consideration of basic properties, such as morphology, connectivity, and spatial distributions can reveal groupings (Bota & Swanson, 2007), which would likely remain undetected by high-throughput transcriptomic analyses alone. Indeed, for the hypothalamus, most published transcriptomic and proteomic analyses have ignored cytoarchitectonic boundary conditions of the diverse gray matter regions in this structure, opting instead to report gene expression patterns from the whole hypothalamus (Khan *et al.*, 2018).

We therefore examined the spatial distributions of hypothalamic TH neurons and quantified the extent of their colocalization with other neurotransmitters or neuropeptides. We first determined whether hypothalamic TH-ir neurons may be either GABAergic or glutamatergic. By combining multi-label immunohistochemistry with cytoarchitectural analysis to obtain high spatial resolution maps of TH-ir neuronal subpopulations, we found that hypothalamic TH-ir neurons were predominantly GABAergic, and that this colocalization was especially prevalent within a specific region of the rostral ZI. We further characterized the neurochemical identity of ZI GABAergic TH-ir neurons and showed that these are dopaminergic neurons, but they do not colocalize with known neuropeptides in the ZI region.

## 2. Materials & Methods

All animal care and experimental procedures were completed in accordance with the guidelines and approval of the Animal Care Committee at Carleton University. Mice were housed in ambient temperature (22–24°C) with a 12:12 light dark cycle with ad libitum access to water and standard mouse chow (Teklad Global Diets 2014, Envigo, Missisauga, Canada).

### 2.1: Generation of *Vgat-cre;L10-Egfp* and *Vglut2-cre;L10-Egfp* mice

To visualize GABAergic and glutamatergic neurons, respectively, we labeled neurons expressing the vesicular GABA transporter (vGAT; *Slc32a1*) or vesicular glutamate transporter 2 (vGlut2; *Scl17a6*) with enhanced GFP fluorescence by crossing a *Vgat-ires-cre* (Stock 028862, Jackson Laboratory, Bar Harbor, ME) or *Vglut2-ires-cre* mouse (Stock No. 16963, Jackson Laboratory) with a Cre-dependent *lox-STOP-lox-L10-Egfp* reporter mouse (Krashes *et al.*, 2014), kindly provided by Dr. B. B. Lowell (Beth Israel Deaconess Medical Center, Boston, MA) to produce *Vgat-cre;L10-Egfp* and *Vglut2-cre;L10-Egfp* mice.

### 2.2: Antibody characterization

**Table 1** lists the following primary antibodies we used for immunohistochemistry (IHC).

*Sheep anti-digoxigenin (DIG) antibody.* When compared to tissue incubated with a DIG-labeled riboprobe followed with the anti-DIG antibody, no hybridization signals were detected when the tissue was incubated with the anti-DIG antibody only (Vazdarjanova *et al.*, 2006).

*Goat anti-dopamine antibody.* Specificity was determined through a gelatin model system and nitrocellulose sheets. The anti-dopamine antibody showed immunoreactivity to even low concentrations of dopamine, with cross-reactivity of less than 10% to noradrenaline, less than 1% to other monoamines, and low levels of cross-reactivity to L-DOPA at higher concentrations (Steinbusch, van Vliet, Bol, & de Vente, 1991).

*Rabbit anti-dopamine  $\beta$ -hydroxylase.* Specificity was determined by the absence of staining if the antibody was first preadsorbed by the DBH peptide (Sockman & Salvante, 2008). The distribution of DBH immunoreactivity was confirmed in the locus coeruleus (data not shown), a region known to express DBH, as previously shown (Yamaguchi, Hopf, Li, & de Lecea, 2018).

*Chicken anti-green fluorescent protein (GFP) antibody.* Wild type brain tissue does not endogenously express the GFP transgene and incubating wild type brain tissue with this antibody did not produce any GFP-ir signals (data not shown).

*Rabbit anti-GFP antibody.* Specificity was determined by the absence of GFP immunoreactivity in the brain of wild type *Drosophila melanogaster*, which does not endogenously produce endogenous GFP molecules (Busch, Selcho, Ito, & Tanimoto, 2009).

*Rabbit anti-melanin-concentrating hormone (MCH) antibody.* The polyclonal anti-MCH antibody was made and generously provided by Dr. E. Maratos-Flier (Beth Israel Deaconess Medical Center, Boston, MA). Specificity was determined by the lack of MCH immunoreactivity after preadsorption with MCH peptide (Elias *et al.*, 1998) or after application to brain tissue from MCH knockout mice (Chee, Pissios, & Maratos-Flier, 2013).

Negishi *et al.*

Atlas maps of hypothalamic TH and vGAT coexpression

*Goat anti-orexin-A antibody.* Specificity was demonstrated by preadsorption with orexin peptide, which abolished all specific staining shown with this antibody (Florenzano *et al.*, 2006).

*Mouse anti-tyrosine hydroxylase (TH) antibody.* Knockdown of *th1* gene that encodes Th in the central nervous system of the zebrafish abolished detectable immunoreactivity from this antibody (Kuscha, Barreiro-Iglesias, Becker, & Becker, 2012). We did not observe any TH-ir signals when this antibody was added to either wild type or *Vgat-cre;L10-Egfp* brain tissue (data not shown).

All secondary antibodies (**Table 2**) were raised in donkey against the species of the conjugated primary antisera (mouse, goat, rabbit, or sheep).

## 2.3: Immunohistochemistry (IHC)

### 2.3.1: Tissue processing

Male and female *Vgat-cre;L10-Egfp*, *Vglut2-cre;L10-Egfp*, and wild type mice on a mixed C57BL/6, FVB, and 129S6 background (8–15 weeks old) were anesthetized with an intraperitoneal (ip) injection of urethane (1.6 g/kg) and transcardially perfused with cold (4°C) 0.9% saline

**Table 1. Details of the primary antibodies used in this study**

| Antibody           | Immunogen                                               | Clonality  | Isotype | Source                                                     | Cat. #      | Lot #    | RRID        | Titer   |
|--------------------|---------------------------------------------------------|------------|---------|------------------------------------------------------------|-------------|----------|-------------|---------|
| sheep anti-DIG     | isolated from sheep immunized with DIG steroid molecule | polyclonal | IgG     | Roche                                                      | 11207733910 | 28557000 | AB_514500   | 1:100   |
| goat anti-dopamine | dopamine-glutaraldehyde-thyroglobulin conjugate         | polyclonal | IgG     | Dr. H. Steinbusch, Maastricht University                   | –           | –        | na          | 1:2,000 |
| rabbit anti-DBH    | purified enzyme from bovine adrenal medulla             | polyclonal | IgG     | Immunostar                                                 | 22806       | 1233001  | AB_572229   | 1:5,000 |
| chicken anti-GFP   | His-tagged GFP isolated from <i>Aequorea victoria</i>   | polyclonal | IgY     | Millipore                                                  | 06-896      | 3022861  | AB_11214044 | 1:2,000 |
| rabbit anti-GFP    | isolated from <i>Aequorea victoria</i>                  | polyclonal | IgG     | Invitrogen                                                 | A6455       | 52630A   | AB_221570   | 1:1,000 |
| rabbit anti-MCH    | full-length MCH peptide                                 | polyclonal | IgG     | Dr. E. Maratos-Flier, Beth Israel Deaconess Medical Center | –           | –        | AB_2314774  | 1:5,000 |
| goat anti-orexin-A | C-terminus of human orexin peptide                      | polyclonal | IgG     | Santa Cruz                                                 | sc-8070     | J2414    | AB_653610   | 1:4,000 |
| mouse anti-TH      | purified from N-terminus in PC12 cells                  | monoclonal | IgG     | Millipore                                                  | MAB318      | 2677893  | AB_2201528  | 1:2,000 |

DIG, digoxigenin; DBH; dopamine beta-hydroxylase; GFP, green fluorescent protein; MCH, melanin-concentrating hormone; na, not available; TH, tyrosine hydroxylase; –, not applicable

**Table 2. Details of the secondary antibodies used in this study**

| Antibody                                       | Isotype   | Source                   | Cat. #      | Lot #    | RRID       | Titer |
|------------------------------------------------|-----------|--------------------------|-------------|----------|------------|-------|
| AffiniPure donkey anti-chicken Alexa Fluor 488 | IgY (H+L) | Jackson ImmunoResearch   | 703-545-155 | 139424   | AB_2340375 | 1:500 |
| AffiniPure donkey anti-goat Alexa Fluor 488    | IgG (H+L) | Jackson ImmunoResearch   | 705-545-147 | 103943   | AB_2336933 | 1:500 |
| AffiniPure donkey anti-rabbit Alexa Fluor 488  | IgG (H+L) | Jackson ImmunoResearch   | 711-545-152 | 125719   | AB_2313584 | 1:200 |
| Donkey anti-rabbit Alexa Fluor 488             | IgG (H+L) | Thermo Fisher Scientific | A-21206     | 19107512 | AB_141708  | 1:500 |
| Donkey anti-mouse Alexa Fluor 568              | IgG (H+L) | Thermo Fisher Scientific | A-10037     | 1827879  | AB_2534013 | 1:500 |
| Donkey anti-goat Alexa Fluor 647               | IgG (H+L) | Thermo Fisher Scientific | A-21447     | 1977345  | AB_2535864 | 1:500 |
| Donkey anti-rabbit Alexa Fluor 647             | IgG (H+L) | Thermo Fisher Scientific | A-31573     | 1903516  | AB_2536183 | 1:300 |

followed by 10% neutral buffered formalin (4°C), unless indicated otherwise. The brain was removed from the skull, post-fixed with 10% formalin for 24 hours at 4°C and then cryoprotected in phosphate-buffered saline (pH 7.4, 0.01 M) containing 20% sucrose and 0.05% sodium azide (4°C). Brains were cut into four or five series of 30 µm-thick coronal-plane sections using a freezing microtome (Leica SM2000R, Nussloch, Germany) and stored in an antifreeze solution containing 50% formalin, 20% glycerol, and 30% ethylene glycol.

To examine dopamine immunoreactivity, *Vgat-cre;L10-Egfp* brains were perfused with cold (4°C) saline and then 1% glutaraldehyde:9% formalin mixture (4°C). The brains were post-fixed in the perfusion solution for 30 minutes and cryoprotected with 30% sucrose solution for 24 hours (4°C). Brains were cut into five series of 30 µm-thick sections and collected into a PBS-azide solution containing 1% formalin. All aforementioned perfusion and incubation solutions contained 1% sodium metabisulfite to prevent the oxidation of dopamine.

### 2.3.2: Immunohistochemistry procedures

Single- and dual-label IHC were completed as previously described (Chee *et al.*, 2013), unless indicated otherwise, using the antibodies and dilution combinations listed in **Tables 1 and 2**. In brief, brain tissue sections were washed with six 5-minute PBS exchanges and then blocked for 2 hours at room temperature (RT, 20–21°C) with 3% normal donkey serum (Jackson ImmunoResearch Laboratories, Inc., West Grove, PA) dissolved in PBS-azide containing 0.25% Triton X-100 (PBT-azide). Unless indicated otherwise, primary antibodies were concurrently added to the blocking serum and incubated with the brain sections overnight (16–18 hours, RT). After washing with six 5-minute PBS rinses, the appropriate secondary antibodies were diluted in PBT containing 3% NDS and applied to the brain tissue sections for 2 hours (RT). The sections were rinsed with three 10-minute PBS washes before being mounted on SuperFrost Plus glass microscope slides (Fisher Scientific, Pittsburgh, PA) and coverslipped (#1.5 thickness) using ProLong Gold antifade reagent containing DAPI (Fisher Scientific, Pittsburgh, PA).

Negishi *et al.*

Atlas maps of hypothalamic TH and vGAT coexpression

To examine dopamine immunoreactivity, *Vgat-cre;L10-Egfp* brain tissues were incubated in PBS containing 0.5% sodium borohydride for 30 minutes at RT, followed by six 5-minute washes in PBS. The brain sections were then blocked with 3% NDS in PBT-azide for 2 hours prior to the simultaneous overnight-incubation (RT) of primary antibodies against GFP (anti-chicken) and TH, then washed with six 5-minute exchanges in PBS, and incubated with the corresponding Alexa Fluor 488- and Cy3-conjugated secondary antibodies in 3% NDS for 2 hours. After three 10-minute PBS rinses of the tissue sections, we diluted the dopamine primary antibody into a 3% NDS, PBT-azide solution and incubated the sections in this mixture overnight at RT. The sections were rinsed with PBS six times for 5 minutes each before incubating them with the corresponding Alexa Fluor 647-conjugated secondary antibody in 3% NDS-PBT. Following three 10-minute washes in PBS, the brain sections were mounted and coverslipped. All solutions used to process the visualization of dopamine immunoreactivity contained 1% sodium metabisulfite to prevent the oxidation of dopamine.

## 2.4: Dual fluorescence *in situ* hybridization (fISH) and IHC

### 2.4.1: Tissue preparation for fISH

*Vgat-cre;L10-Gfp* mice were anesthetized with urethane (1.6 g/kg, ip), and their brains were rapidly removed and snap-frozen on powdered dry ice. The brains were thawed to  $-16^{\circ}\text{C}$  and sliced into ten series of 16  $\mu\text{m}$ -thick coronal sections through the entire hypothalamus using a cryostat (CM3050 S, Leica Microsystems, Buffalo Grove, IL). Each section was thaw-mounted on Superfrost Plus slides (Fisher Scientific), air-dried at RT, and then stored at  $-80^{\circ}\text{C}$  until processed for fISH.

### 2.4.2: fISH and IHC procedure

The antisense vGAT riboprobe corresponds to nucleotide 875–1,416 of mouse *Slc32a1* mRNA (*Vgat*; NM\_009508.2) (Agostinelli *et al.*, 2017). Using a plasmid linearized with *SacI* (New England Biolabs, Beverly, MA), it was transcribed with T7 polymerase (Promega, Madison, WI) in the presence of digoxigenin (DIG)-conjugated UTP (Roche Diagnostics, Mannheim, Germany).

fISH for *Vgat* mRNA was performed according to the protocol previously described for fresh frozen sections (Wittmann, Hrabovszky, & Lechan, 2013). In brief, prior to hybridization, the sections were fixed with 4% paraformaldehyde for 20 minutes and rinsed with three 10-minute PBS washes; acetylated with 0.25% acetic anhydride in 0.1 M triethanolamine and rinsed with three PBS washes; then dehydrated in an ethanol gradient starting from 80%, 95%, to 100% for 1 minute each, chloroform for 10 minutes, and again in 100% and 95% ethanol for 1 minute each. The riboprobe (650 pg/ $\mu\text{l}$ ) was mixed with hybridization buffer containing 50% formamide, 2 $\times$  sodium citrate buffer (SSC), 1 $\times$  Denhardt's solution (Sigma), 0.25 M Tris buffer (pH 8.0), 10% dextran sulfate, 3.5% dithiothreitol, 265  $\mu\text{g}/\text{ml}$  denatured salmon sperm DNA (Sigma), and applied directly to each slide under a plastic Fisherbrand coverslip (Fisher Scientific). Hybridization occurred overnight at  $56^{\circ}\text{C}$  in humidity chambers. Following hybridization, we removed the coverslip and the sections were washed in 1 $\times$  SSC for 15 minutes; treated with 25  $\mu\text{g}/\text{ml}$  RNase A (Sigma) dissolved in 0.5 M NaCl, 10 mM Tris, 1 mM EDTA (pH 8.0) for 1 hour ( $37^{\circ}\text{C}$ ); sequentially washed at  $65^{\circ}\text{C}$  with 1 $\times$  SSC for 15 minutes, 0.5 $\times$  SSC for 15 minutes, and 0.1 $\times$  SSC for 1 hour. Subsequently,

Negishi *et al.*

Atlas maps of hypothalamic TH and vGAT coexpression

the sections were treated with PBS containing 0.5% Triton X-100 and 0.5% H<sub>2</sub>O<sub>2</sub> (pH 7.4) for 15 minutes, rinsed in three 10-minute PBS washes, then immersed in 0.1 M maleate buffer (pH 7.5) for 10 minutes before blocking in 1% Blocking Reagent (Roche) for 10 minutes. The sections were incubated in horseradish peroxidase-conjugated, sheep anti-DIG antibody in blocking reagent and enclosed over sections with a CoverWell incubation chamber (Grace Bio-Labs Inc., Bend, OR) overnight at 4°C. After rinsing with three 10-minute PBS washes, the hybridization signal was amplified with a TSA Plus Biotin Kit (Perkin Elmer, Waltham, MA), by diluting the TSA Plus biotin reagent (1:400) in 0.05 M Tris (pH 7.6) containing 0.01% H<sub>2</sub>O<sub>2</sub>, for 30 minutes. The sections were incubated with streptavidin-conjugated Alexa Fluor 555 (1:500; S32355, Invitrogen) in 1% Blocking Reagent for 2 hours (RT) to label the Vgat mRNA hybridization signal.

Following fISH, we processed the sections for immunofluorescence by incubating them with a GFP (anti-rabbit) antibody, rinsing with three 10-minute PBS washes, and labeling with an Alexa Fluor 488-conjugate (anti-rabbit; Jackson ImmunoResearch). Finally, the sections were then washed in PBS and coverslipped with Vectashield mounting medium containing DAPI (H-1200, Vector Laboratories, Burlingame, CA).

## 2.5: Microscopy

All images were exported as TIFF files into Adobe Illustrator CS4 (Adobe Systems Inc., San Jose, CA) for assembly into multi-panel figures and to add text labels and arrowheads.

### 2.5.1: Epifluorescence imaging

Images showing the colocalization between Vgat mRNA and GFP-ir in *Vgat-cre;L10-Egfp* tissue were captured using a Zeiss Axioplan 2 microscope (Carl Zeiss Inc., Göttingen, Germany) equipped with a RT SPOT digital camera (Diagnostic Instruments, Sterling Heights, MI). Adobe Photoshop CS4 (Adobe) was used to create composite images and to modify brightness or contrast to increase the visibility of lower level signals.

Large field-of-view images of whole brain sections were acquired with a fully motorized Nikon Ti2 inverted microscope (Nikon Instruments Inc., Mississauga, Canada) mounted with a Prime 95B CMOS camera (Photometrics, Tucson, AZ) using a CF160 Plan Apochromat ×20 objective lens (0.75 numerical aperture). Images were stitched using NIS Elements software (Nikon), which was also used to adjust image brightness and contrast.

### 2.5.2: Confocal imaging

High-magnification confocal stacks (2048 × 2048 pixels) involving two- or three-color fluorescence channels were visualized using a Nikon C2 confocal microscope fitted with Plan Apochromat ×20 (0.75 numerical aperture) or ×40 objective lenses (0.95 numerical aperture) and acquired using NIS Elements software (Nikon). The excitation light was provided by 488-nm, 561-nm, and 640-nm wavelength lasers for the visualization of Alexa Fluor 488, Alexa Fluor 568, and Alexa Fluor 647, respectively. We used NIS Elements (Nikon) to stitch overlapping frames, flatten confocal stacks by maximum intensity projection, and adjust the brightness or contrast of flattened images. Two-color images were coded in green (Alexa Fluor 488) and pseudo-colored

Negishi *et al.*

Atlas maps of hypothalamic TH and vGAT coexpression

magenta (Alexa Fluor 568). Three-color images were coded in green (Alexa Fluor 488), red (Alexa Fluor 568), and pseudo-colored light blue (Alexa Fluor 647).

## 2.6: Nissl-based parcellations and mapping

An Olympus BX53 microscope (Olympus Corporation, Tokyo, Japan) was used to examine Nissl-stained tissue sections. Photomicrographs were produced with an Olympus DP74 color camera powered by CellSens Dimension software (Version 2.3). Contrast enhancements and brightness adjustments were made with Photoshop (Version CS6; Adobe) before analyses. Photomicrographs of Nissl-stained tissue were imported to Adobe Illustrator (Version CC 2014, Adobe) and regional boundaries were drawn on a separate data layer. Line parcellations were made using the nomenclature and boundary definitions of the *Allen Reference Atlas* (ARA; Dong, 2008). To the extent that was applicable, cytoarchitectural criteria outlined in the rat brain atlas of Swanson (2018) were also used to clarify delineations. Parcellations were then carefully superimposed on corresponding fluorescence images to precisely reveal the spatial distributions of TH- and vGAT-ir neurons. Plane-of-section analysis was performed, as we described previously (Zseli *et al.*, 2016), to determine the appropriate ARA atlas level assignment(s) for each Nissl-stained tissue section. We photographed fluorescently-immunostained tissue sections using a Zeiss Axio Imager M.2 microscope (Carl Zeiss Corporation, Thornwood, NY) using  $\times 10$  (0.3 numerical aperture) and  $\times 20$  (0.8 numerical aperture) Plan Aplanachromat objective lenses. An EXi Blue monochrome camera (Qimaging, Inc., Surrey, British Columbia, Canada) was used to capture multi-channel fluorescence images and a motorized stage controlled by Volocity Software (Version 6.1.1; Perkin-Elmer, Inc., Waltham, MA) aided in generating stitched mosaic images. Image files were then exported in TIFF format to allow further processing using Adobe Photoshop.

Using the parcellations that were superimposed onto the corresponding epifluorescence image, cells that existed within the parcellated boundaries were marked using the *Blob Brush Tool* in Adobe Illustrator. A red circle represented a TH-positive cell, and a blue circle represented a TH- and vGAT-positive cell. These cell representations were then superimposed onto the ARA reference atlas template (Dong, 2008) at the corresponding atlas level, thus creating atlas-based maps of the tissue of interest.

## 2.7: Cell counting

The numbers of cells counted from the procedures below are semi-quantitative measures meant to provide data for relative comparisons rather than absolute cell numbers within the hypothalamus.

### 2.7.1: Quantification of *Vgat* hybridization signals.

We acquired stitched epifluorescence images for whole hypothalamic sections using a  $\times 10$  objective on a fully motorized Olympus BX61VS microscope running VS-ASW-FL software (Olympus). We viewed the images offline using OlyVIA software (Olympus) in order to quantify the colocalization of *Vgat* hybridization signals, which expressed red fluorescence, in GFP-ir neurons from *Vgat-cre;L10-Egfp* brain tissue. Cells were counted using a grid comprising 1-inch  $\times$  1-inch squares that was printed on a transparency. This grid was overlaid onto the magnified image on the computer screen so that each grid encompassed a 100- $\mu\text{m}^2$  area of the brain. We

Negishi *et al.*

Atlas maps of hypothalamic TH and vGAT coexpression

counted from one hemisphere and placed the first counting square starting at the ventral edge of the base of the brain, *i.e.*, at the median eminence, then working dorsally and away from the third ventricle until the cerebral peduncle. In order to avoid double-counting, cells that landed on the gridlines were not included in the count. The percentage of colocalization was quantified by determining the number of Vgat mRNA neurons relative to the number of GFP-ir neurons.

### 2.7.2: *Quantification of EGFP fluorescence and TH immunoreactivity.*

We acquired stitched epifluorescence images using a  $\times 10$  objective (0.3 numerical aperture) on an Olympus BX53 microscope mounted with the Olympus DP74 camera, and cell counts were determined using Adobe Illustrator CS5 (Adobe). We counted all neurons displaying TH immunoreactivity, which exhibited red fluorescence, and determined the proportion of these neurons that also displayed EGFP fluorescence. The percentage of colocalization was calculated with respect to the parcellation-based cytoarchitectural boundaries and only the neurons that fell within the defined boundaries were counted.

## 2.8: Statistics

Line of best-fit for linear regressions was determined using Prism 6.07 (GraphPad Software Inc., San Diego, CA). All frequency distribution histograms were generated with Prism. All data are expressed as the mean  $\pm$  standard error of the mean (SEM).

### 3. Results

#### 3.1: Catecholaminergic neurons in the hypothalamus may be GABAergic

Catecholaminergic neurons are distributed throughout the hypothalamus (Björklund & Lindvall, 1984; Dahlström & Fuxe, 1964; Hökfelt et al., 1976; Ruggiero et al., 1984), and we determined if they may coexpress the neurotransmitter glutamate or GABA, which can be marked by their expression of vGLUT2 or vGAT, respectively. We therefore determined if TH-ir neurons in *Vglut2-cre;L10-Egfp* and *Vgat-cre;L10-Egfp* mouse brain tissue, respectively, also express native EGFP fluorescence (EGFP-f). Interestingly, we did not observe any TH-ir EGFP-f neurons from the hypothalamus of *Vglut2-cre;L10-Egfp* mice (**Fig. 1**); in contrast, colocalization between TH-ir and EGFP-f occurred in *Vgat-cre;L10-Egfp* brain tissue (**Fig. 2**). These observations suggested that hypothalamic TH-ir neurons may be GABAergic but not glutamatergic.



**Figure 1.** Hypothalamic catecholamine neurons are not glutamatergic. Representative stitched confocal photomicrographs showing the medial hypothalamic zone within 600  $\mu\text{m}$  of the third ventricle (V3) in *Vglut2-cre;L10-Egfp* mice at the inferred anteroposterior positions (in mm) from Bregma  $-0.5$  (**a**),  $-1.3$  (**d**),  $-1.6$  (**g**), and  $-2.2$  (**j**). Merged confocal photomicrographs (**b**, **e**, **h**, **k**) from the respective outlined area (**a**, **d**, **g**, **j**) indicate that TH-ir neurons (open white arrowheads) do not express native EGFP fluorescence (green; **c**, **f**, **i**, **l**). Scale bar: 200  $\mu\text{m}$  in **j** also applies to **a**, **d**, **g**; 20  $\mu\text{m}$  in **l** also applies to **b**, **c**, **e**, **f**, **h**, **i**, **k**.



**Figure 2.** Some hypothalamic catecholaminergic neurons are GABAergic. Representative stitched confocal photomicrographs showing the medial hypothalamic zone within 600  $\mu\text{m}$  of the third ventricle (V3) in *Vglut2-cre;L10-Egfp* mice at the inferred anteroposterior positions (in mm) from Bregma  $-0.5$  (**a**),  $-1.3$  (**d**),  $-1.6$  (**g**), and  $-2.2$  (**j**). Merged confocal photomicrographs (**b**, **e**, **h**, **k**) from the respective outlined area in (**a**, **d**, **g**, **j**) indicate that the vast majority of TH-ir neurons (*filled white arrowheads*) coexpress native EGFP fluorescence (*green*; **c**, **f**, **i**, **l**). *Open white arrowheads* (**h**, **i**) mark TH-ir neurons that do not coexpress EGFP fluorescence. Scale bar: 200  $\mu\text{m}$  in **j** also applies to **a**, **d**, **g**; 20  $\mu\text{m}$  in **l** also applies to **b**, **c**, **e**, **f**, **h**, **i**, **k**.

We determined the efficacy and specificity of EGFP-f to indicate vGAT-expressing neurons in *Vgat-cre;L10-Egfp* mice by assessing the colocalization of Vgat mRNA hybridization (Vgat-ISH) in GFP-ir neurons (**Fig. 3**). We counted from one hemisphere of the hypothalamus and found that more than 99% of GFP-ir neurons (18,697 out of 18,805) expressed Vgat-ISH signals. Thus EGFP-positive neurons have nearly complete one-to-one correspondence with Vgat-ISH in the hypothalamus. Furthermore, less than 1% of the Vgat-ISH neurons counted (138 out of 18,835) were not GFP-ir in the hypothalamus, so the likelihood of under-reporting a Vgat-positive neuron was minimal. These findings validated the use of the *Vgat-cre;L10-Egfp* mouse model for unambiguous detection of GABAergic vGAT-positive hypothalamic neurons by EGFP-f.

### 3.2: Distribution of GABAergic TH-ir neurons in the hypothalamus

The hypothalamus includes gray matter regions starting rostrally at the level of the anteroventral

Negishi *et al.*

periventricular nucleus (AVP) and proceeding caudally until the emergence of the ventral tegmental area. In the mouse, the hypothalamus extends approximately 3 mm along the anteroposterior axis (+0.445 to -2.48 mm from Bregma), and this distance is represented across 33 levels (L; L50–L83) in the reference space of the *Allen Reference Atlas* (ARA) (Dong, 2008). We observed TH-ir neurons throughout the entire rostrocaudal extent of the hypothalamus, where they were dispersed in numerous gray matter regions. We evaluated the distributions of TH-ir neurons across the ARA reference space (Fig. 4a), including those TH-ir that coexpress EGFP-f (Fig. 4b). Overall, there was a strong linear relationship between EGFP-f in TH-ir neurons ( $r = 0.969$ ,  $R^2 = 0.939$ ; Fig. 4c).

In order to increase the spatial resolution for visualizing the distribution of TH-ir neurons in the hypothalamus, we mapped their locations onto ARA atlas templates (Dong, 2008) (Fig. 5) and quantified the proportion of TH-ir neurons that coexpress EGFP-f in each parcellated gray matter region of the hypothalamus (Table 3). All regions with detectable labeling of TH-ir neurons are tabulated using the hierarchical organization of brain structures presented by the ARA (Allen Institute for Brain Science, 2011). The colocalization of TH immunoreactivity with EGFP-f occurred at low (<50%), moderate (50–80%), or high frequencies (>80%) of colocalization.

### 3.2.1: The periventricular zone

The TH-ir neurons in the periventricular zone were distributed within three main brain regions: the paraventricular hypothalamic nucleus (PVH), periventricular hypothalamic nucleus (PV), and arcuate hypothalamic nucleus (ARH) (Table 3). These neurons were distributed across L56–L74

Atlas maps of hypothalamic TH and vGAT coexpression



**Figure 3.** Visualization of GABAergic vGAT neurons by GFP fluorescence. Epifluorescence photomicrograph showing vGAT mRNA hybridization signals in GFP-ir neurons from *Vgat-cre;L10-Egfp* mice. High magnification photomicrographs from the outlined area from (a) show that almost all GFP-ir neurons (b) express *Vgat* mRNA hybridization signal (c) in the merged image (d). Filled white arrowheads indicate representative *Vgat*-ISH and GFP-ir colocalized neurons while open arrowheads point to a GFP-ir neuron that is vGAT-negative. Scale bar: 200  $\mu$ m (a); 25  $\mu$ m (b, c, d).

Negishi *et al.*

Atlas maps of hypothalamic TH and vGAT coexpression



**Figure 4.** Distributions of TH-ir neurons with the colocalization of EGFP fluorescence in *Vgat-cre;L10-Egfp* brain tissue. Number of TH-ir neurons (**a, d, g, j, m**) that coexpress native EGFP fluorescence (**b, e, h, k, n**) at each atlas level throughout the whole hypothalamus (**a, b**), periventricular hypothalamic zone (PVZ; **d, e**), periventricular hypothalamic region (PVR; **g, h**), hypothalamic medial zone (MEZ; **j, k**), and hypothalamic lateral zone (LZ; **m, n**). Correlation between the coexpression of native EGFP fluorescence in TH-ir neurons at all brain regions in each atlas level of the whole hypothalamus (**c**), PVZ (**f**), PVR (**i**), MEZ (**l**), and LZ (**o**). *Dark blue bars in m and n and the dark blue filled circles in o correspond to regions within the zona incerta.*





Negishi *et al.*

Atlas maps of hypothalamic TH and vGAT coexpression

**Figure 5 (previous pages).** Mapped distributions of GABAergic TH-ir neurons in the hypothalamus. Representative transverse maps, arranged from rostral to caudal order (**a-l**), show the distributions of TH-ir neurons that colocalize (*blue circles*) or do not colocalize (*red circles*) with native EGFP fluorescence from *Vgat-cre;L10-Egfp* mice. Consultation of Nissl-stained tissue guided the assignment of neurons to parcellated cytoarchitectonic boundaries in the TH-ir tissue, and facilitated their mapping to gray matter regions of the *Allen Reference Atlas* (ARA). Each panel includes a portion of the atlas template for a given ARA level, the numerical designation of the atlas level (*bottom left*), the corresponding inferred stereotaxic coordinate from Bregma ( $\beta$ , in mm; *bottom right*), and the brain region labels adopted from formal nomenclature of the ARA (Dong, 2008).

**Table 3. Quantification of EGFP-labeled TH-immunoreactive neurons from *Vgat-cre;L10-Egfp* mouse brain tissue**

| Brain region <sup>1</sup>             | Abbrev. <sup>2</sup> | ARA Level (L) <sup>3</sup> | No. of neurons <sup>4</sup> |                             |                        |
|---------------------------------------|----------------------|----------------------------|-----------------------------|-----------------------------|------------------------|
|                                       |                      |                            | TH-ir                       | EGFP-f + TH-ir <sup>5</sup> | % Co-loc. <sup>6</sup> |
| <i>Periventricular zone</i>           |                      |                            |                             |                             |                        |
| Supraoptic nucleus                    | SO                   | 56–63                      | 0 <sup>7</sup>              | 0                           |                        |
| Accessory supraoptic group            | ASO                  |                            | n/a <sup>8</sup>            | n/a                         |                        |
| Paraventricular hypothalamic nucleus  |                      |                            |                             |                             |                        |
| Magnocellular division                |                      |                            |                             |                             |                        |
| Anterior magnocellular part           | PVHam                |                            | n/a                         | n/a                         |                        |
| Medial magnocellular part             | PVHmm                | 60–65                      | 3 ± 2                       | 2 ± 1                       | 67                     |
| Posterior magnocellular part          |                      |                            |                             |                             |                        |
| Lateral zone                          | PVHpml               | 56–59                      | 2 ± 2                       | 0                           |                        |
| Medial zone                           | PVHpmm               | 63                         | 1 ± 0                       | 0                           |                        |
| Parvicellular division                |                      |                            |                             |                             |                        |
| Anterior parvicellular part           | PVHap                | 56–59                      | 63 ± 9                      | 57 ± 11                     | 90                     |
| Dorsal zone                           | PVHmpd               | 60–66                      | 13 ± 6                      | 8 ± 4                       | 63                     |
| Periventricular part                  | PVHpV                | 56–65                      | 5 ± 4                       | 3 ± 2                       | 60                     |
| Periventricular hypothalamic nucleus  |                      |                            |                             |                             |                        |
| Anterior part                         | PVa                  | 59–61                      | 13 ± 7                      | 12 ± 6                      | 90                     |
| Intermediate part                     | PVi <sup>9</sup>     | 62–64                      | 12 ± 1                      | 11 ± 1                      | 91                     |
|                                       |                      | 65–67                      | 45 ± 8                      | 39 ± 5                      | 87                     |
|                                       |                      | 68–74                      | 6 ± 3                       | 5 ± 2                       | 84                     |
| Arcuate hypothalamic nucleus          |                      |                            |                             |                             |                        |
|                                       | ARH <sup>9</sup>     | 65–67                      | 9 ± 4                       | 6 ± 4                       | 73                     |
|                                       |                      | 68–71                      | 136 ± 28                    | 118 ± 26                    | 87                     |
|                                       |                      | 72–74                      | 43 ± 15                     | 37 ± 14                     | 88                     |
| <i>Periventricular region</i>         |                      |                            |                             |                             |                        |
| Anteroventral preoptic nucleus        | ADP                  | 51–53                      | 0                           | 0                           |                        |
| Anterior hypothalamic area            | AHA                  |                            | n/a                         | n/a                         |                        |
| Anteroventral preoptic nucleus        | AVP                  | 50–54                      | 2 ± 2                       | 1 ± 1                       |                        |
| Anteroventral periventricular nucleus | AVPV                 | 51–53                      | 8 ± 7                       | 1 ± 1                       | 13                     |
| Dorsomedial hypothalamic nucleus      |                      |                            |                             |                             |                        |
| Anterior part                         | DMHa                 | 67–69                      | 50 ± 14                     | 47 ± 14                     | 92                     |
|                                       |                      | 70–74                      | 9 ± 5                       | 7 ± 4                       | 93                     |

**Table 3 (continued)**

| Brain region <sup>1</sup>                    | Abbrev. <sup>2</sup> | ARA Level (L) <sup>3</sup> | No. of neurons <sup>4</sup> |                             |                        |
|----------------------------------------------|----------------------|----------------------------|-----------------------------|-----------------------------|------------------------|
|                                              |                      |                            | TH-ir                       | EGFP-f + TH-ir <sup>5</sup> | % Co-loc. <sup>6</sup> |
| <i>Periventricular region (continued)</i>    |                      |                            |                             |                             |                        |
| Dorsomedial hypothalamic nucleus (continued) |                      |                            |                             |                             |                        |
| Posterior part                               | DMHp                 | 70–74                      | 19 ± 5                      | 16 ± 4                      | 81                     |
| Ventral part                                 | DMHv                 | 71–74                      | 17 ± 4                      | 15 ± 4                      | 87                     |
| Median preoptic nucleus                      | MEPO                 |                            | n/a                         | n/a                         |                        |
| Medial preoptic area                         | MPO                  | 50–55                      | 15 ± 8                      | 15 ± 8                      | 98                     |
|                                              |                      | 56–58                      | 7 ± 5                       | 5 ± 4                       | 73                     |
| Vascular organ of the lamina terminalis      | OV                   |                            | n/a                         | n/a                         |                        |
| Posterodorsal preoptic nucleus               | PD                   |                            | 0                           | 0                           |                        |
| Parastrial nucleus                           | PS                   |                            | 0                           | 0                           |                        |
| Suprachiasmatic preoptic nucleus             | PSCH                 |                            | n/a                         | n/a                         |                        |
| Periventricular hypothalamic nucleus         |                      |                            |                             |                             |                        |
| Posterior part                               | PVp                  | 75–79                      | 13 ± 4                      | 9 ± 3                       | 72                     |
| Preoptic part                                | PVpo                 | 54–66                      | 90 ± 8                      | 84 ± 8                      | 93                     |
| Subparaventricular zone                      | SBPV                 | 60–63                      | 55 ± 2                      | 51 ± 1                      | 93                     |
| Subfornical organ                            | SFO                  |                            | n/a                         | n/a                         |                        |
| Ventrolateral preoptic nucleus               | VLPO                 | 53–55                      | 0                           | 0                           |                        |
| <i>Hypothalamic medial zone</i>              |                      |                            |                             |                             |                        |
| Anterior hypothalamic nucleus                |                      |                            |                             |                             |                        |
| Anterior part                                | AHNa                 | 58–64                      | 0                           | 0                           |                        |
| Central part                                 | AHNc                 | 59–64                      | 3 ± 1                       | 2 ± 1                       | 75                     |
| Dorsal part                                  | AHNd                 |                            | n/a                         | n/a                         |                        |
| Posterior part                               | AHNp                 | 63–66                      | 11 ± 2                      | 10 ± 2                      | 88                     |
| Mammillary body                              |                      |                            |                             |                             |                        |
| Lateral mammillary nucleus                   | LM                   | 78–81                      | 0                           | 0                           |                        |
| Medial mammillary nucleus                    | MM                   | 79–82                      | 0                           | 0                           |                        |
| Supramammillary nucleus                      |                      |                            |                             |                             |                        |
| Lateral part                                 | SUMl                 | 78–82                      | 6 ± 4                       | 0                           | 0                      |
| Medial part                                  | SUMm                 | 78–82                      | 9 ± 9                       | 0                           | 0                      |
| Tuberomammillary nucleus                     |                      |                            |                             |                             |                        |
| Dorsal part                                  | TMd                  | 75–77                      | 0                           | 0                           |                        |
| Ventral part                                 | TMv                  | 77–79                      | 0                           | 0                           |                        |
| Medial preoptic nucleus                      |                      |                            |                             |                             |                        |
| Central part                                 | MPNc                 | 53–55                      | 0                           | 0                           |                        |
| Lateral part                                 | MPNI                 | 54–58                      | 2 ± 1                       | 2 ± 0                       |                        |
| Medial part                                  | MPNm                 | 54–58                      | 5 ± 2                       | 3 ± 0                       | 57                     |
| Dorsal preammillary nucleus                  | PMd                  |                            |                             |                             |                        |

**Table 3 (continued)**

| Brain region <sup>1</sup>                                 | Abbrev. <sup>2</sup> | ARA Level (L) <sup>3</sup> | No. of neurons <sup>4</sup> |                             |                        |
|-----------------------------------------------------------|----------------------|----------------------------|-----------------------------|-----------------------------|------------------------|
|                                                           |                      |                            | TH-ir                       | EGFP-f + TH-ir <sup>5</sup> | % Co-loc. <sup>6</sup> |
| <i>Hypothalamic medial zone (continued)</i>               |                      |                            |                             |                             |                        |
| Ventral premammillary nucleus                             | PMv                  |                            |                             |                             |                        |
| Paraventricular hypothalamic nucleus, descending division |                      |                            |                             |                             |                        |
| Dorsal parvicellular part                                 | PVHdp                | 60–65                      | 0                           | 0                           |                        |
| Forniceal part                                            | PVHf                 |                            | n/a                         | n/a                         |                        |
| Lateral parvicellular part                                | PVHlp                | 66                         | 7 ± 3                       | 7 ± 4                       | 95                     |
| Medial parvicellular part, ventral zone                   | PVHmpv               | 64, 65                     | 0                           | 0                           |                        |
| Ventromedial hypothalamic nucleus                         |                      |                            |                             |                             |                        |
| Anterior part                                             | VMHa                 | 65–66                      | 0                           | 0                           |                        |
| Central part                                              | VMHc                 | 67–73                      | 2 ± 2                       | 2 ± 2                       |                        |
| Dorsomedial part                                          | VMHdm                | 67–71                      | 0                           | 0                           |                        |
| Ventrolateral part                                        | VMHvl                | 66–73                      | 0                           | 0                           |                        |
| <i>Hypothalamic lateral zone</i>                          |                      |                            |                             |                             |                        |
| Lateral hypothalamic area                                 | LHA                  | 59–79                      | 25 ± 19                     | 14 ± 12                     | 54                     |
| Lateral preoptic area                                     | LPO                  | 50–59                      | 1 ± 1                       | 1 ± 1                       |                        |
| Posterior hypothalamic nucleus                            | PH                   | 70–82                      | 14 ± 7                      | 2 ± 1                       | 12                     |
| Preparasubthalamic nucleus                                | PST                  | 72                         | 0                           | 0                           |                        |
| Parasubthalamic nucleus                                   | PSTN                 | 75–78                      | 15 ± 8                      | 3 ± 1                       | 18                     |
| Retrochiasmatic area                                      | RCH                  |                            | n/a                         | n/a                         |                        |
| Subthalamic nucleus                                       | STN                  | 75–78                      | 15 ± 8                      | 4 ± 3                       | 30                     |
| Tuberal nucleus                                           | TU                   | 65–75                      | 13 ± 5                      | 9 ± 4                       | 67                     |
| Zona incerta                                              | ZI                   | 61–66                      | 0                           | 0                           |                        |
|                                                           |                      | 67–69                      | 147 ± 32                    | 147 ± 32                    | 100                    |
|                                                           |                      | 70–83                      | 7 ± 1                       | 4 ± 2                       | 57                     |
| Dopaminergic group                                        | Zlda                 | 67–79                      | 18 ± 8                      | 18 ± 8                      | 100                    |
| Fields of Forel                                           | FF                   | 78, 79                     | 2 ± 2                       | 0                           |                        |

<sup>1</sup>Organization of brain regions based on the hierarchical structure presented by the *Allen Reference Atlas* (ARA; Allen Institute for Brain Science, 2011).

<sup>2</sup>Nomenclature and atlas level based on the ARA (Dong, 2008).

<sup>3</sup>Each brain region may span several atlas levels.

<sup>4</sup>The total number of tyrosine hydroxylase-immunoreactive (TH-ir) neurons counted bilaterally from parcellated brain regions. Data are reported as mean ± SEM (n = 3 mice), rounded to the nearest whole number.

<sup>5</sup>Quantification of TH-ir neurons that coexpress native EGFP fluorescence (EGFP-f) in TH-ir neurons.

<sup>6</sup>Percentage of TH-ir neurons that colocalized (Coloc.) with EGFP-f indicate the proportion of GABAergic TH neurons. No value will be provided if the mean of two or less than two TH-ir neurons was counted.

<sup>7</sup>Parcellated brain regions that did not contain a TH-ir neuron.

<sup>8</sup>Data are not available (n/a) from brain regions that either did not emerge following Nissl-based parcellations or are not parcellated in the ARA.

Negishi *et al.*

Atlas maps of hypothalamic TH and vGAT coexpression

and were highly (85–90%) colocalized with EGFP-f, which showed a very strong linear relationship with TH expression ( $r = 0.996$ ,  $R^2 = 0.992$ ; **Fig. 4d–f**).

TH-ir neurons in the PVH were largely confined to its parvicellular division and were most numerous within the anterior parvicellular part (PVHap), and 90% of PVHap TH-ir neurons expressed EGFP-f (**Table 3**; L56–L59; **Fig. 5c–f**). In contrast, the dorsal zone (PVHmpd; **Table 3**) or periventricular part (PVHpv; L56–59; **Fig. 5c–f**; **Table 3**) of the parvicellular PVH contained much fewer TH-ir neurons and 60–63% of these cells also expressed EGFP-f (**Table 3**).

Most of the TH-ir neurons in the periventricular zone abutted the third ventricle. Within this zone, the entire periventricular hypothalamic nucleus that was mapped extended through 15 atlas levels, including the anterior (PVa) and intermediate (PVi) parts, and 85–90% of TH-ir neurons in this region expressed EGFP-f (L59–74; **Fig. 5f–r**). Notably, the middle portion of the PVi (L65–L67) expressed the most EGFP- and TH-positive neurons (**Fig. 5j–l**). In the ARH, TH-ir neurons were distributed throughout the entire rostrocaudal extent of the structure, but were most abundant within the dorsomedial aspect of the ARH at L68–L71 (**Fig. 5m–p**). TH-ir neurons were distributed in varying densities through the ARH along its anteroposterior expanse, and 73–88% of these neurons colocalized EGFP-f.

### 3.2.2: *The periventricular region*

The periventricular region included brain regions across virtually the entire rostrocaudal extent of the hypothalamus, though TH-ir neurons were clustered either toward its rostral (L52–L63) or posterior aspects (L67–L76) (**Fig. 4g–h**). Overall, most TH-ir neurons in the periventricular region also colocalized with EGFP-f ( $r = 0.993$ ,  $R^2 = 0.985$ ; **Fig. 4i**), but we found region-to-region differences at several atlas levels.

Within the rostral periventricular region, TH-ir neurons were most abundant in the preoptic part of the periventricular hypothalamic nucleus (PVpo; L54–58), and 93% of these neurons colocalized with EGFP-f (**Table 3**; **Fig. 5b–e**). Colocalized neurons that fell on or immediately outside the parcellated boundaries of PVpo in L57 were included in the cell counts for PVpo (**Fig. 5d**). There were also notable TH-ir neurons in the subparaventricular zone (SBPV) that displayed very high colocalization with EGFP-f (**Table 3**; **Fig. 5g, h**). Other areas in the periventricular hypothalamic region contained a few TH-ir neurons in the anteroventral periventricular nucleus (AVPV) and medial preoptic area (MPO). Colocalization of EGFP-f in TH-ir neurons of the AVPV was low (**Table 3**; **Fig. 5a**) but high (73–98%) in the MPO (**Table 3**; **Fig. 5b–e**).

Within the caudal periventricular region, TH-ir neurons were found in the posterior part of the periventricular hypothalamic nucleus (PVp; L75–79), where 72% of them colocalized with EGFP-f (**Table 3**; **Fig. 5s–w**), and in the dorsomedial nucleus of the hypothalamus (DMH; **Table 3**). Aside from a small cluster of cells lining the dorsomedial tip of the anterior part of DMH (DMHa) at L67 (**Fig. 5l**), TH-ir neurons were sparsely distributed throughout the remaining DMHa (L68–74), as well as the ventral (DMHv; L71–74), and posterior (DMHp; L70–74) parts of the DMH. TH-ir neurons throughout the entire DMH showed between 80–90% colocalization with EGFP-f.

### 3.2.3: *The hypothalamic medial zone*

The hypothalamic medial zone rarely contained TH-ir neurons (**Fig. 4j–k**), and overall, there

Negishi *et al.*

Atlas maps of hypothalamic TH and vGAT coexpression was only a weak correlation between EGFP-f and TH-ir neurons ( $r = 0.402$ ,  $R^2 = 0.62$ ; **Fig. 4l**). There were few, if any, TH-ir neurons within the anterior (AHNa) or central (AHNc) parts of the anterior hypothalamic nucleus, but the posterior part (AHNp) contained distinct TH-ir neurons that colocalized with EGFP-f (**Table 3**; **Fig. 5f–k**). A few TH-ir neurons were observed in the caudal hypothalamus in the supramammillary nucleus (SUM) between L78–L82, but none of these neurons colocalized with EGFP-f (**Table 3**; **Fig. 5v–w**).

Notably, the PVH, which contained a moderate density of colocalized EGFP-f and TH-ir neurons within the periventricular zone, only displayed few such neurons within the hypothalamic medial zone (in its descending division), specifically in the lateral parvicellular part (PVHlp) (L66; **Fig. 5k**).

### 3.2.4: The lateral hypothalamic zone

With the exception of the zona incerta (ZI), which accounted for most of the positive TH-ir neurons between L66–69, the brain regions in the lateral hypothalamic zone primarily contained a low density of TH-ir neurons (**Fig. 4m**), and very few displayed EGFP-f (**Fig. 4n**). In the anterior region of the lateral hypothalamic zone, the lateral hypothalamic and lateral preoptic areas contained few, if any, TH-ir neurons that colocalized EGFP-f. Towards the posterior regions, the posterior hypothalamic nucleus (PH), parasubthalamic nucleus (PSTN), subthalamic nucleus (STN), and tuberal nucleus (TU) contained few TH-ir neurons. With the exception of the TU TH-ir neurons, which had moderate (67%) colocalization (**Table 3**), the other regions displayed low (15–30%) colocalization with EGFP-f (**Table 3**).

In contrast, we found a high density of TH-ir neurons in the ZI, particularly within L67–L69 (**Fig. 5l–n**), and every TH-ir neuron in this space displayed EGFP-f (**Fig. 5k–n**). The majority of these TH-ir EGFP-f neurons lined the ventral edge of the ZI at L67 and clustered within the medial aspect of the ZI at L68. Interestingly, the majority of these neurons resided outside the cytoarchitectural boundaries of the cell group named the dopaminergic group within the ZI (ZI<sub>da</sub>) in the ARA, although those that fell within its boundaries also displayed EGFP-f (**Fig. 5l–n**).

### 3.3: Striking distribution pattern of GABAergic TH-ir neurons within the zona incerta



**Figure 6.** TH-ir neurons in the ZI do not express MCH or H/O. Confocal photomicrographs from the lateral hypothalamic zone of wild type mouse tissue illustrating the distributions of MCH-ir (**a–d**) and H/O-ir neurons (**e–h**) relative to TH-ir neurons. *White open arrowheads* show lack of MCH- (**b**) or H/O- (**f**) positive labeling (**f**) in TH-ir neurons (**c**, **g**) in merged, high-magnification photomicrographs (**d**, **h**) from the outlined areas in **a** and **e**, respectively. Scale bars: 100  $\mu\text{m}$  (**a**, **e**); 30  $\mu\text{m}$  (**b–d**); 50  $\mu\text{m}$  (**f–h**).

Negishi *et al.*

Atlas maps of hypothalamic TH and vGAT coexpression

While several hypothalamic regions displayed strong colocalization between TH immunoreactivity and EGFP-f, the distribution pattern of neurons with such colocalization was the most prominent and specific within the ZI. The ZI is a relatively expansive region that spans 2.33 mm along the rostrocaudal axis of the mouse brain, as represented within the ARA reference space between L61–L83. EGFP-f colocalized with all TH-ir ZI neurons found from L67 to L69 (**Fig. 5I–n**). The ZI stood out among brain regions because the degree of colocalization of TH-ir neurons with EGFP-f was the most complete there among all brain regions analyzed at each atlas level (see right- and upper-most data points in **Fig. 4, panels c and o**). In contrast, there were very few TH-ir neurons anterior to L67 that were within the cytoarchitectonic boundaries of the ZI (**Fig. 5g–k**), only a few TH-ir ZI neurons that were located between L70–L83 (*see Fig. 5o–w for L70–79*), and only 57% of ZI neurons residing outside L67–L69 colocalized with EGFP-f (**Table 3**).

### 3.4: Neurochemical characterization of GABAergic TH-ir neurons



**Figure 7.** GABAergic TH-ir neurons in the ZI do not express dopamine  $\beta$ -hydroxylase. Confocal photomicrographs from the ZI of *Vgat-cre;L10-Egfp* brain tissue (**a**) show native EGFP fluorescence (**b**) in TH-ir neurons (**c**) but not immunoreactivity for dopamine  $\beta$ -hydroxylase (DBH; **d**). Filled white arrowheads mark a representative sample of GABAergic TH-ir neurons (**b, c**) from the outlined area (**a**) that do not express DBH, as indicated by open white arrowheads (**d**). Scale bars: 100  $\mu$ m (**a**); 50  $\mu$ m (**b, c, d**). V3, third ventricle.

The hypothalamus is enriched by the expression of diverse neuropeptides, including those residing within or surrounding the ZI within the lateral hypothalamic zone, such as MCH and H/O. Previous reports have determined that MCH (Chee *et al.*, 2015) and H/O neurons (Schöne *et al.*, 2012) are glutamatergic. To confirm that the ZI TH-ir neurons do not colocalize these neuropeptides, we performed dual-label IHC reactions for TH and either MCH or H/O. Consistent with previous work and our findings that all TH-ir neurons in the ZI colocalize with EGFP-f, which indicates vGAT expression (**Fig. 2**), these reactions did not show the colocalization of either MCH (**Fig. 6a–d**) or H/O (**Fig. 6e–h**) immunoreactivity with TH-ir neurons.

TH is the rate-limiting enzyme for all catecholamine neurotransmitter synthesis (Udenfriend & Wyngaarden, 1956; Nagatsu, Levitt & Udenfriend, 1964) in mammals and is commonly used as a marker of catecholaminergic neurons. However it does not further specify the terminal catecholamine (*i.e.*, dopamine, norepinephrine, or epinephrine) synthesized by the neuron. Within the catecholamine biosynthesis pathway, dopamine is hydroxylated by dopamine  $\beta$ -hydroxylase (DBH) into norepinephrine, which can be converted into epinephrine with the addition of a methyl group. We did not

Negishi *et al.*

observe DBH-ir neurons in any region within the hypothalamus, as dual-label IHC for DBH and TH immunoreactivities in *Vgat-cre;L10-Egfp* tissue did not reveal DBH-ir neurons within the ZI (**Fig. 7**). These results show that TH-ir ZI neurons lack the enzymatic machinery to synthesize norepinephrine, and hence also epinephrine. Therefore, we determined if TH-ir ZI neurons would display immunoreactivity to dopamine. To this end, we performed triple-label IHC for dopamine, TH, and GFP in the ZI of *Vgat-cre;L10-Egfp* mouse brain tissue and found that almost all GFP- and TH-ir neurons also displayed dopamine immunoreactivity (**Fig. 8**).

#### 4. Discussion

Hypothalamic catecholaminergic neurons can be marked by the expression of TH, a rate-limiting enzyme for catecholamine biosynthesis, and the majority of TH neurons also coexpress vGAT, and therefore may also signal via the neurotransmitter GABA. We mapped the locations of TH-ir neurons onto atlas templates from the *Allen Reference Atlas* (Dong, 2008) to provide high-spatial resolution maps for their distribution throughout the hypothalamus. Several hypothalamic regions, including the arcuate and paraventricular hypothalamic nuclei, contained a high density of GABAergic TH neurons, but the most striking pattern of GABAergic TH neurons was observed within a highly circumscribed portion of the rostral ZI. As of yet, we did not find that these ZI neurons colocalized with a neuropeptide; however, our neurochemical characterization to identify their catecholamine content revealed that these neurons also contain dopamine.

The use of a standardized neuroanatomical framework to visualize and map the distribution of TH neurons onto atlas templates revealed this remarkable specificity. The ZI spans more than 2.3 mm rostrocaudally, but almost all TH neurons were observed to reside specifically within a 0.2 mm-long segment of the ZI between L67–L69. Furthermore, these TH neurons appear to be homogeneous in their neurochemical makeup based on their colocalization of vGAT and dopamine, but not H/O or MCH neuropeptides, or additional monoamines such as norepinephrine and epinephrine.

Our Nissl stains in the mouse brain highlight the presence of a compact region within the ZI, which is also labeled *Zlda* according to ABA nomenclature, but it is notable that the observed

Atlas maps of hypothalamic TH and vGAT coexpression



**Figure 8.** GABAergic TH-ir neurons in the ZI express dopamine. Confocal photomicrographs from the ZI of *Vgat-cre;L10-Egfp* brain tissue (**a**) show the colocalization of GFP (**b**), TH (**c**), and dopamine (**d**) immunoreactivity at high magnification within the same neuron. *White filled arrowheads* indicate representative GFP-, TH-, and dopamine-ir neurons. Scale bars: 50 μm (**a**); 20 μm (**b-d**). V3, third ventricle.

Negishi *et al.*

Atlas maps of hypothalamic TH and vGAT coexpression

GABAergic TH neurons in our study were located primarily medial and ventral to this compact cell group. It has been previously reported that the medial and ventral/lateral distributions of TH neurons in the ZI may be differentiated by cell diameter (Ruggiero *et al.*, 1984), but we only considered cell location and not cell size in our observations. Commonly used mouse brain atlases (Dong, 2008; Franklin & Paxinos, 2012) make reference to the A13 or dopaminergic cell group of the ZI, respectively, based on cytoarchitectural features. However, given that GABAergic TH neurons in the mouse ZI fall outside of the compact region assigned these labels, the compact cell group in the mouse ZI may only approximate the location of dopaminergic neurons, and the naming of this subregion of the ZI may warrant revision in future editions of these atlases.

Transcriptomic analysis of neurons in the lateral hypothalamic area has also demonstrated the GABAergic and dopaminergic profile of TH neurons, which express genes encoding enzymes to synthesize GABA (*Gad1* and *Gad2*) and dopamine (*Ddc* and *Th*) as well as their respective vesicular transporters *Slc32a1* or vGAT for GABA and *Slc18a2* or vMAT2 for dopamine (Mickelsen *et al.*, 2019). ZI TH neurons can synthesize dopamine and transport it into synaptic vesicles using the vesicular monoamine transporter, vMAT2 (Sharma, Kim, Mayr, Elliott, & Whelan, 2018). Similarly, ZI TH neurons also express glutamate decarboxylase (GAD) to synthesize GABA (Shin *et al.*, 2007) and we showed here that all ZI TH neurons express vGAT to transport GABA into synaptic vesicles (**Figures 7, 8**); thus they have the machinery to mediate GABAergic neurotransmission. By contrast, we did not find that ZI TH neurons colocalized with major neuropeptides in the lateral hypothalamic zone and, in light of a recent transcriptomic analysis of TH neurons in this area, we also do not expect that ZI TH neurons would colocalize with a neuropeptide. MCH and H/O neurons do not overlap in the same cytoarchitectural space and both are glutamatergic (Chee *et al.*, 2015; Mickelsen *et al.*, 2019). Moreover, TH neurons do not show enriched gene expression for neuropeptides such as cocaine- and amphetamine-regulated transcript protein, galanin, neuropeptide W, neuropeptide Y, neurotensin, somatostatin, and tachykinin; that are expressed in GABAergic neurons in the lateral hypothalamus.

GAD expression was once commonly used to identify GABAergic neurons, but recent studies have shown that GABA synthesis in neurons does not necessarily signify that such neurons also release it (Williams *et al.*, 2014; Chee *et al.*, 2015). We therefore chose to identify GABAergic neurons based on vGAT expression, which we visualized by cre-dependent EGFP expression in *Vgat-cre* neurons. Gross, qualitative comparison of *Vgat* hybridization signals had shown its expression in expected brain regions (Vong *et al.*, 2011). Therefore, we performed quantitative analyses to address any possible ectopic EGFP expression at the neuronal level. At least in the hypothalamus, we found that more than 99% of EGFP-expressing neurons expressed *Vgat* mRNA, thus confirming robust and accurate labeling of vGAT neurons in the hypothalamus of *Vgat-cre* mice. GABA is often reported as a co-transmitter in dopaminergic cells. For example, dopaminergic neurons in the ventral tegmental area may transport GABA and dopamine via the same vesicular transporter, vMAT2, suggesting that these two chemical messengers may be co-packaged (Tritsch, Ding, & Sabatini, 2012). However, in other regions such as the olfactory bulb, GABA and dopamine are not necessarily co-packaged, and they may utilize independent modes of vesicular release that occur over different time courses (Borisovska, Bensen, Chong, & Westbrook, 2013). We are pursuing histological studies to map the projection targets of ZI TH neurons, as well as functional studies to determine if these purportedly GABAergic and dopaminergic ZI neurons may release GABA and/or dopamine at downstream neurons.

Negishi *et al.*

Atlas maps of hypothalamic TH and vGAT coexpression

GABAergic neurons within the ZI have recently been shown to modulate the motivational and hedonic aspects of feeding through direct projections to the paraventricular nucleus of the thalamus (PVT) (Zhang & van den Pol, 2017), but it is not known if dopamine also acts at the PVT to stimulate feeding. The PVT receives projections from ZI TH neurons (Li, Shi, & Kirouac, 2014) and expresses dopamine D2 receptors, which are linked to its role in drug addiction (Clark *et al.*, 2017). There is at least a foundational basis for dopamine- and GABA-mediated transmission in the PVT, but it remains to be determined if these chemical messengers would mediate the same behavioral roles at the PVT or elsewhere. For instance, another ZI GABA pathway targets the periaqueductal gray (PAG), and is implicated in the regulation of flight and freezing responses (Chou *et al.*, 2018). A neuroanatomical tracing study showed ZI TH projections to the PAG in rats (Messanvi, Eggen-Meijer, Roozendaal, & van der Want, 2013) allowing for the possibility of a role for dopamine in mediating defensive behaviors.

Our work broadly supports the view that GABA co-transmission is a ubiquitous feature of dopaminergic neurons (Tritsch, Granger, & Sabatini, 2016). Overall, we found vGAT-EGFP signals colocalized in 82% of hypothalamic TH-ir neurons, though some regions may show higher or lower levels of colocalization (**Table 3**). Outside the ZI, the largest number vGAT-positive TH neurons were distributed through the PVH, PV, and ARH, which may project to the pituitary (Ju, Liu, & Tao, 1986) and mediate neurosecretory functions (Markakis & Swanson, 1997). For example, TH neurons send projections to the median eminence to enable dopamine-mediated inhibition of prolactin release from the anterior pituitary gland (Ben-Jonathan, Oliver, Weiner, Mical, & Porter, 1977; Ben-Jonathan & Hnasko, 2001). Similarly, cells in the anterior pituitary express all GABA receptor subtypes (Anderson & Mitchell, 1986) and GABA administration can also inhibit prolactin release (Grandison & Guidotti, 1979). Thus, in addition to mediating local neurocircuitry to regulate behavior, the colocalization of GABA and dopamine in neurons can also mediate neuroendocrine functions.

While hypothalamic TH neurons have been reported since the 1970s (Hökfelt, Johansson, Fuxe, Goldstein, & Park, 1976), our maps provide high spatial-resolution analysis of TH neurons in the mouse hypothalamus. Further, this dataset is enriched by defining subpopulations of TH neurons that may also be GABAergic. These maps contribute a standardized dataset that can be used to derive precise stereotaxic coordinates that can be used to target these discrete subpopulations in

functional studies.

## References

- Agostinelli, L. J., Ferrari, L. L., Mahoney, C. E., Mochizuki, T., Lowell, B. B., Arrigoni, E., & Scammell, T. E. (2017). Descending projections from the basal forebrain to the orexin neurons in mice. *J Comp Neurol*, *525*(7), 1668–1684. doi:10.1002/cne.24158
- Allen Institute for Brain Science. (2011). Technical white paper: Allen reference atlas, version 1 (2008) (PDF file). from Allen Institute for Brain Science <http://help.brain-map.org/display/mousebrain/Documentation>
- Anderson, R. A., & Mitchell, R. (1986). Effects of gamma-aminobutyric acid receptor agonists on the secretion of growth hormone, luteinizing hormone, adrenocorticotrophic hormone and thyroid-stimulating hormone from the rat pituitary gland *in vitro*. *J Endocrinol*, *108*(1), 1–8.
- Ben-Jonathan, N., & Hnasko, R. (2001). Dopamine as a prolactin (PRL) inhibitor. *Endocr Rev*, *22*(6), 724–763. doi:10.1210/edrv.22.6.0451
- Ben-Jonathan, N., Oliver, C., Weiner, H. J., Mical, R. S., & Porter, J. C. (1977). Dopamine in hypophysial portal plasma of the rat during the estrous cycle and throughout pregnancy. *Endocrinol*, *100*(2), 452–458. doi:10.1210/endo-100-2-452
- Björklund, A., & Lindvall, O. (1984). Dopamine-containing systems in the CNS. In: A. Björklund & T. Hökfelt (Eds.), *Handbook of Chemical Neuroanatomy, Volume 2: Classical Transmitters in the CNS, Part I* (pp. 55–122). Amsterdam: Elsevier.
- Björklund, A., & Nobin, A. (1973). Fluorescence histochemical and microspectrofluorometric mapping of dopamine and noradrenaline cell groups in the rat diencephalon. *Brain Res*, *51*, 193–205. doi:10.1016/0006-8993(73)90372-7
- Borisovska, M., Bensen, A. L., Chong, G., & Westbrook, G. L. (2013). Distinct modes of dopamine and GABA release in a dual transmitter neuron. *J Neurosci*, *33*(5), 1790–1796. doi:10.1523/JNEUROSCI.4342-12.2013
- Bota, M., & Swanson, L. W. (2007). The neuron classification problem. *Brain Res Rev*, *56*(1), 79–88. doi:10.1016/j.brainresrev.2007.05.005
- Broberger, C., De Lecea, L., Sutcliffe, J. G., & Hökfelt, T. (1998). Hypocretin/orexin- and melanin-concentrating hormone-expressing cells form distinct populations in the rodent lateral hypothalamus: relationship to the neuropeptide Y and agouti gene-related protein systems. *J Comp Neurol*, *402*(4), 460–474. doi:10.1002/(SICI)1096-9861(19981228)402:4%3C460::AID-CNE3%3E3.0.CO;2-S
- Broberger, C., Johansen, J., Johansson, C., Schalling, M., & Hökfelt, T. (1998). The neuropeptide Y/agouti gene-related protein (AGRP) brain circuitry in normal, anorectic, and monosodium glutamate-treated mice. *Proc Natl Acad Sci U S A*, *95*(25), 15043–15048. doi:10.1073/pnas.95.25.15043
- Busch, S., Selcho, M., Ito, K., & Tanimoto, H. (2009). A map of octopaminergic neurons in the *Drosophila* brain. *J Comp Neurol*, *513*(6), 643–667. doi:10.1002/cne.21966
- Chee, M. J., Arrigoni, E., & Maratos-Flier, E. (2015). Melanin-concentrating hormone neurons release glutamate for feedforward inhibition of the lateral septum. *J Neurosci*, *35*(8), 3644–3651.

doi:10.1523/JNEUROSCI.4187-14.2015

Chee, M. J., Pissios, P., & Maratos-Flier, E. (2013). Neurochemical characterization of neurons expressing melanin-concentrating hormone receptor 1 in the mouse hypothalamus. *J Comp Neurol*, *521*(10), 2208–2234. doi:10.1002/cne.23273

Chou, X. L., Wang, X., Zhang, Z. G., Shen, L., Zingg, B., Huang, J., . . . Tao, H. W. (2018). Inhibitory gain modulation of defense behaviors by zona incerta. *Nat Commun*, *9*(1), 1151. doi:10.1038/s41467-018-03581-6

Clark, A. M., Leroy, F., Martyniuk, K. M., Feng, W., McManus, E., Bailey, M. R., . . . Kellendonk, C. (2017). Dopamine D2 receptors in the paraventricular thalamus attenuate cocaine locomotor sensitization. *eNeuro*, *4*(5). doi:10.1523/ENEURO.0227-17.2017

Crosetto, N., Bienko, M., & van Oudenaarden, A. (2015). Spatially resolved transcriptomics and beyond. *Nat Rev Genet*, *16*(1), 57–66. doi:10.1038/nrg3832

Dahlström, A., & Fuxe, K. (1964). Evidence for the existence of monoamine-containing neurons in the central nervous system. I. Demonstration of monoamines in the cell bodies of brain stem neurons. *Acta Physiol Scand, Suppl 232*:231–255.

Dong, H. W. (2008). *The Allen reference atlas: A digital color brain atlas of the C57BL/6J male mouse*. Hoboken, NJ: John Wiley & Sons.

Elias, C. F., Saper, C. B., Maratos-Flier, E., Tritos, N. A., Lee, C., Kelly, J., . . . Elmquist, J. K. (1998). Chemically defined projections linking the mediobasal hypothalamus and the lateral hypothalamic area. *J Comp Neurol*, *402*(4), 442–459. doi:10.1002/(SICI)1096-9861(19981228)402:4<442::AID-CNE2>3.0.CO;2-R

Everitt, B. J., Meister, B., Hökfelt, T., Melander, T., Terenius, L., Rokaeus, A., . . . et al. (1986). The hypothalamic arcuate nucleus-median eminence complex: Immunohistochemistry of transmitters, peptides and DARPP-32 with special reference to coexistence in dopamine neurons. *Brain Res*, *396*(2), 97–155. doi:10.1016/s0006-8993(86)80192-5

Florenzano, F., Viscomi, M. T., Mercaldo, V., Longone, P., Bernardi, G., Bagni, C., . . . Carrive, P. (2006). P2X2R purinergic receptor subunit mRNA and protein are expressed by all hypothalamic hypocretin/orexin neurons. *J Comp Neurol*, *498*(1), 58–67. doi:10.1002/cne.21013

Franklin, K. B., & Paxinos, G. (2012). *The mouse brain in stereotaxic coordinates (4th ed.)*. New York, NY: Academic Press.

Grandison, L., & Guidotti, A. (1979). gamma-Aminobutyric acid receptor function in rat anterior pituitary: evidence for control of prolactin release. *Endocrinol*, *105*(3), 754–759. doi:10.1210/endo-105-3-754

Hahn, T. M., Breininger, J. F., Baskin, D. G., & Schwartz, M. W. (1998). Coexpression of Agrp and NPY in fasting-activated hypothalamic neurons. *Nat Neurosci*, *1*(4), 271–272. doi:10.1038/1082

Hökfelt, T., Holets, V. R., Staines, W., Meister, B., Melander, T., Schalling, M., . . . et al. (1986). Coexistence of neuronal messengers – an overview. *Prog Brain Res*, *68*, 33–70. doi:10.1016/s0079-6123(08)60230-7

Hökfelt, T., Johansson, O., Fuxe, K., Goldstein, M., & Park, D. (1976). Immunohistochemical studies on the localization and distribution of monoamine neuron systems in the rat brain. I.

Negishi *et al.*

Atlas maps of hypothalamic TH and vGAT coexpression

Tyrosine hydroxylase in the mes- and diencephalon. *Med Biol*, 54(6), 427–453.

Ju, G., Liu, S., & Tao, J. (1986). Projections from the hypothalamus and its adjacent areas to the posterior pituitary in the rat. *Neurosci*, 19(3), 803–828. doi: 10.1016/0306-4522(86)90300-3

Khan, A. M., Grant, A. H., Martinez, A., Burns, G., Thatcher, B. S., Anekonda, V. T., . . . Blevins, J. E. (2018). Mapping molecular datasets back to the brain regions they are extracted from: Remembering the native countries of hypothalamic expatriates and refugees. *Adv Neurobiol*, 21, 101–193. doi:10.1007/978-3-319-94593-4\_6

Krashes, M. J., Shah, B. P., Madara, J. C., Olson, D. P., Strohlic, D. E., Garfield, A. S., . . . Lowell, B. B. (2014). An excitatory paraventricular nucleus to AgRP neuron circuit that drives hunger. *Nature*, 507(7491), 238–242. doi:10.1038/nature12956

Kuscha, V., Barreiro-Iglesias, A., Becker, C. G., & Becker, T. (2012). Plasticity of tyrosine hydroxylase and serotonergic systems in the regenerating spinal cord of adult zebrafish. *J Comp Neurol*, 520(5), 933–951. doi:10.1002/cne.22739

Li, S., Shi, Y., & Kirouac, G. J. (2014). The hypothalamus and periaqueductal gray are the sources of dopamine fibers in the paraventricular nucleus of the thalamus in the rat. *Front Neuroanat*, 8, 136. doi:10.3389/fnana.2014.00136

Markakis, E. A., & Swanson, L. W. (1997). Spatiotemporal patterns of secretomotor neuron generation in the parvocellular neuroendocrine system. *Brain Res Rev*, 24(2–3), 255–291. doi:10.1016/S0165-0173(97)00006-4

Messanvi, F., Eggens-Meijer, E., Roozendaal, B., & van der Want, J. J. (2013). A discrete dopaminergic projection from the incertohypothalamic A13 cell group to the dorsolateral periaqueductal gray in rat. *Front Neuroanat*, 7, 41. doi:10.3389/fnana.2013.00041

Mickelsen, L. E., Bolisetty, M., Chimileski, B. R., Fujita, A., Beltrami, E. J., Costanzo, J. T., . . . Jackson, A. C. (2019). Single-cell transcriptomic analysis of the lateral hypothalamic area reveals molecularly distinct populations of inhibitory and excitatory neurons. *Nat Neurosci*, 22(4), 642–656. doi:10.1038/s41593-019-0349-8

Mickelsen, L. E., Kolling, F. W., Chimileski, B. R., Fujita, A., Norris, C., Chen, K., . . . Jackson, A. C. (2017). Neurochemical heterogeneity among lateral hypothalamic hypocretin/orexin and melanin-concentrating hormone neurons identified through single-cell gene expression analysis. *eNeuro*, 4(5). doi:10.1523/ENEURO.0013-17.2017

Naganuma, F., Bandaru, S. S., Absi, G., Chee, M. J., & Vetrivelan, R. (2019). Melanin-concentrating hormone neurons promote rapid eye movement sleep independent of glutamate release. *Brain Struct Funct*, 224(1), 99–110. doi:10.1007/s00429-018-1766-2

Nagatsu, T., Levitt, M., & Udenfriend, S. (1964). Conversion of L-tyrosine to 3,4-dihydroxyphenylalanine by cell-free preparations of brain and sympathetically innervated tissues. *Biochem Biophys Res Commun*, 14, 543–549. doi:10.1016/0006-291x(64)90266-9

Paxinos, G., & Watson, C. R. (2014). *The rat brain in stereotaxic coordinates (7th ed.)*. Sydney, Australia: Academic Press.

Romanov, R. A., Zeisel, A., Bakker, J., Girach, F., Hellysaz, A., Tomer, R., . . . Harkany, T. (2017). Molecular interrogation of hypothalamic organization reveals distinct dopamine neuronal subtypes. *Nat Neurosci*, 20(2), 176–188. doi:10.1038/nn.4462

- Negishi *et al.* Atlas maps of hypothalamic TH and vGAT coexpression
- Ruggiero, D. A., Baker, H., Joh, T. H., & Reis, D. J. (1984). Distribution of catecholamine neurons in the hypothalamus and preoptic region of mouse. *J Comp Neurol*, 223(4), 556–582. doi:10.1002/cne.902230408
- Schneeberger, M., Tan, K., Nectow, A. R., Parolari, L., Caglar, C., Azevedo, E., . . . Friedman, J. M. (2018). Functional analysis reveals differential effects of glutamate and MCH neuropeptide in MCH neurons. *Mol Metab*, 13, 83–89. doi:10.1016/j.molmet.2018.05.001
- Schöne, C., Apergis-Schoute, J., Sakurai, T., Adamantidis, A., & Burdakov, D. (2014). Coreleased orexin and glutamate evoke nonredundant spike outputs and computations in histamine neurons. *Cell Rep*, 7(3), 697–704. doi:10.1016/j.celrep.2014.03.055
- Schöne, C., Cao, Z. F., Apergis-Schoute, J., Adamantidis, A., Sakurai, T., & Burdakov, D. (2012). Optogenetic probing of fast glutamatergic transmission from hypocretin/orexin to histamine neurons *in situ*. *J Neurosci*, 32(36), 12437–12443. doi:10.1523/JNEUROSCI.0706-12.2012
- Sears, R. M., Liu, R. J., Narayanan, N. S., Sharf, R., Yeckel, M. F., Laubach, M., . . . DiLeone, R. J. (2010). Regulation of nucleus accumbens activity by the hypothalamic neuropeptide melanin-concentrating hormone. *J Neurosci*, 30(24), 8263–8273. doi:10.1523/jneurosci.5858-09.2010
- Sharma, S., Kim, L. H., Mayr, K. A., Elliott, D. A., & Whelan, P. J. (2018). Parallel descending dopaminergic connectivity of A13 cells to the brainstem locomotor centers. *Sci Rep*, 8(1), 7972. doi:10.1038/s41598-018-25908-5
- Shin, S. Y., Yang, J. H., Lee, H., Erdelyi, F., Szabo, G., Lee, S. Y., & Ryu, P. D. (2007). Identification of the adrenoceptor subtypes expressed on GABAergic neurons in the anterior hypothalamic area and rostral zona incerta of GAD65-eGFP transgenic mice. *Neurosci Lett*, 422(3), 153–157. doi:10.1016/j.neulet.2007.05.060
- Sockman, K. W., & Salvante, K. G. (2008). The integration of song environment by catecholaminergic systems innervating the auditory telencephalon of adult female European starlings. *Dev Neurobiol*, 68(5), 656–668. doi:10.1002/dneu.20611
- Steinbusch, H. W. M., van Vliet, S. P., Bol, J., G. J. M., & de Vente, J. (1991). Development and application of antibodies to primary (DA, L-DOPA) and secondary (cGMP) messengers: A technical report. In A. Calas & D. Eugène (Eds.), *Neurocytochemical Methods. NATO ASI Series (Series H: Cell Biology)* (Vol. 58, pp. 1–27). Berlin: Springer-Verlag.
- Swanson, L. W. (2018). *Brain maps 4.0 – Structure of the rat brain: An open access atlas with global nervous system nomenclature ontology and flatmaps*. *J Comp Neurol*, 526(6), 935–943. doi:10.1002/cne.24381
- Tong, Q., Ye, C. P., Jones, J. E., Elmquist, J. K., & Lowell, B. B. (2008). Synaptic release of GABA by AgRP neurons is required for normal regulation of energy balance. *Nat Neurosci*, 11(9), 998–1000. doi:10.1038/nn.2167
- Tritsch, N. X., Ding, J. B., & Sabatini, B. L. (2012). Dopaminergic neurons inhibit striatal output through non-canonical release of GABA. *Nature*, 490(7419), 262–266. doi:10.1038/nature11466
- Tritsch, N. X., Granger, A. J., & Sabatini, B. L. (2016). Mechanisms and functions of GABA co-release. *Nat Rev Neurosci*, 17(3), 139–145. doi:10.1038/nrn.2015.21
- Udenfriend, S., & Wyngaarden, J. B. (1956). Precursors of adrenal epinephrine and norepinephrine *in vivo*. *Biochim Biophys Acta*, 20(1), 48–52. doi:10.1016/0006-3002(56)90261-x

Negishi *et al.*

Atlas maps of hypothalamic TH and vGAT coexpression

van den Pol, A. N. (2012). Neuropeptide transmission in brain circuits. *Neuron*, *76*(1), 98–115. doi:10.1016/j.neuron.2012.09.014

Vazdarjanova, A., Ramirez-Amaya, V., Insel, N., Plummer, T. K., Rosi, S., Chowdhury, S., . . . Barnes, C. A. (2006). Spatial exploration induces ARC, a plasticity-related immediate-early gene, only in calcium/calmodulin-dependent protein kinase II-positive principal excitatory and inhibitory neurons of the rat forebrain. *J Comp Neurol*, *498*(3), 317–329. doi:10.1002/cne.21003

Vong, L., Ye, C., Yang, Z., Choi, B., Chua, S., & Lowell, B. B. (2011). Leptin action on GABAergic neurons prevents obesity and reduces inhibitory tone to POMC neurons. *Neuron*, *71*(1), 142–154. doi:10.1016/j.neuron.2011.05.028

Williams, R. H., Chee, M. J., Kroeger, D., Ferrari, L. L., Maratos-Flier, E., Scammell, T. E., & Arrigoni, E. (2014). Optogenetic-mediated release of histamine reveals distal and autoregulatory mechanisms for controlling arousal. *J Neurosci*, *34*(17), 6023–6029. doi:10.1523/JNEUROSCI.4838-13.2014

Wittmann, G., Hrabovszky, E., & Lechan, R. M. (2013). Distinct glutamatergic and GABAergic subsets of hypothalamic pro-opiomelanocortin neurons revealed by in situ hybridization in male rats and mice. *J Comp Neurol*, *521*(14), 3287–3302. doi:10.1002/cne.23350

Wu, M., Dumalska, I., Morozova, E., van den Pol, A., & Alreja, M. (2009). Melanin-concentrating hormone directly inhibits GnRH neurons and blocks kisspeptin activation, linking energy balance to reproduction. *Proc Natl Acad Sci U S A*, *106*(40), 17217–17222. doi:10.1073/pnas.0908200106

Yamaguchi, H., Hopf, F. W., Li, S. B., & de Lecea, L. (2018). *In vivo* cell type-specific CRISPR knockdown of dopamine beta hydroxylase reduces locus coeruleus evoked wakefulness. *Nat Commun*, *9*(1), 5211. doi:10.1038/s41467-018-07566-3

Zhang, X., & van den Pol, A. N. (2015). Dopamine/tyrosine hydroxylase neurons of the hypothalamic arcuate nucleus release GABA, communicate with dopaminergic and other arcuate neurons, and respond to dynorphin, met-enkephalin, and oxytocin. *J Neurosci*, *35*(45), 14966–14982. doi:10.1523/JNEUROSCI.0293-15.2015

Zhang, X., & van den Pol, A. N. (2016). Hypothalamic arcuate nucleus tyrosine hydroxylase neurons play orexigenic role in energy homeostasis. *Nat Neurosci*, *19*(10), 1341–1347. doi:10.1038/nn.4372

Zhang, X., & van den Pol, A. N. (2017). Rapid binge-like eating and body weight gain driven by zona incerta GABA neuron activation. *Science*, *356*(6340), 853–859. doi:10.1126/science.aam7100

Zséli, G., Vida, B., Martinez, A., Lechan, R. M., Khan, A. M., & Fekete, C. (2016). Elucidation of the anatomy of a satiety network: Connectivity of the parabrachial nucleus in the adult rat. *J Comp Neurol*, *524*, 2803–2827. doi:10.1002/cne.23992
